# Supplementary material for: Complete chloroplast genomes of Cerastium alpinum, C. arcticum and C. nigrescens: genome structures, comparative and phylogenetic analysis
Source: PubMed Central journal article supplement (PMC10618263; doi:10.1038/s41598-023-46017-y), 2023-10-31
Supplement: 41598_2023_46017_MOESM1_ESM.pdf [file 41598_2023_46017_MOESM1_ESM.pdf]

# **Complete chloroplast genomes of *Cerastium alpinum*, *C. arcticum* and *C. nigrescens*: genome structures, comparative and phylogenetic analysis**

Sylwia E. Milarska<sup>1</sup>, Piotr Androsiuk<sup>1\*</sup>, Łukasz Pauksto<sup>2</sup>, Jan P. Jastrzębski<sup>1</sup>, Mateusz Maździarz<sup>2</sup>, Keith Larson<sup>3</sup> and Irena Gielwanowska<sup>1</sup>

<sup>1</sup> Department of Plant Physiology, Genetics and Biotechnology, Faculty of Biology and Biotechnology, University of Warmia and Mazury in Olsztyn, ul. M. Oczapowskiego 1A, 10-719 Olsztyn, Poland;

<sup>2</sup> Department of Botany and Nature Protection, Faculty of Biology and Biotechnology, University of Warmia and Mazury in Olsztyn, Pl. Łódzki 1, 10-721 Olsztyn, Poland;

<sup>3</sup> Climate Impacts Research Centre, Department of Ecology and Environmental Sciences, Umeå University, 901 87, Umeå, Sweden.

\* corresponding author – [piotr.androsiuk@uwm.edu.pl](mailto:piotr.androsiuk@uwm.edu.pl)

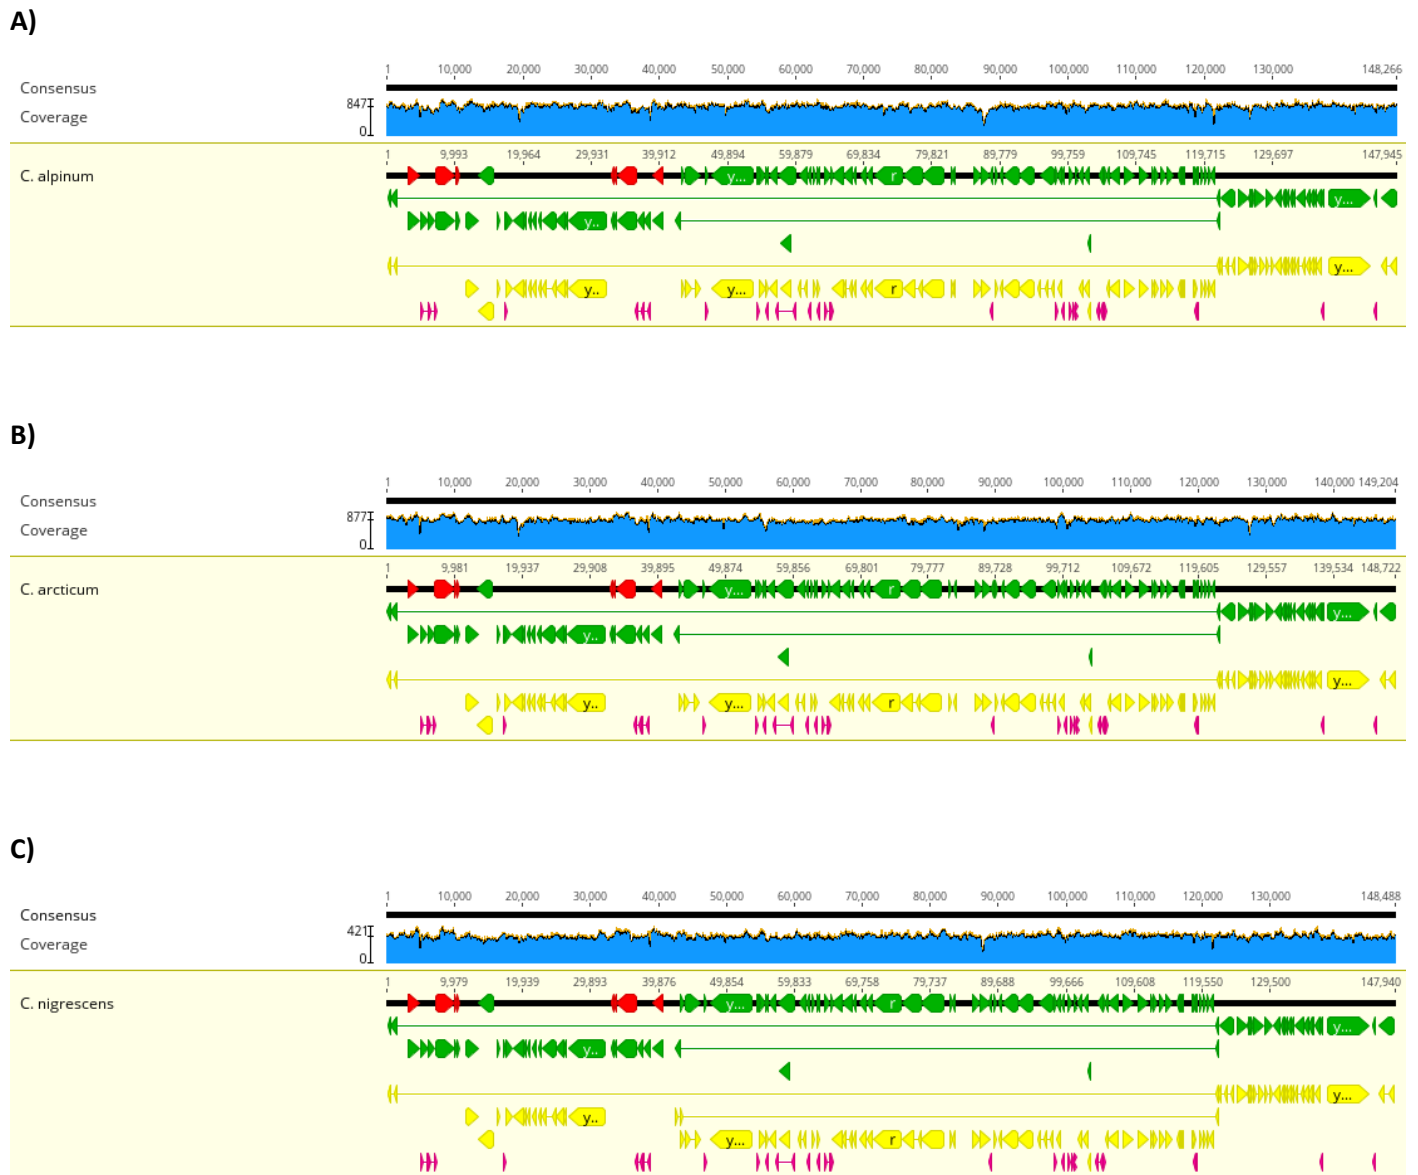

**Figure S1.** The chloroplast genome coverage depth of *Cerastium alpinum* (A), *Cerastium arcticum* (B) and *Cerastium nigrescens* (C).
