# Supplementary material for: Complete chloroplast genomes of Cerastium alpinum, C. arcticum and C. nigrescens: genome structures, comparative and phylogenetic analysis
Source: PubMed Central journal article supplement (PMC10618263; doi:10.1038/s41598-023-46017-y), 2023-10-31
Supplement: 41598_2023_46017_MOESM6_ESM.pdf [file 41598_2023_46017_MOESM6_ESM.pdf]

**Supplementary file legend:**

**Supplementary Table S1** Codon usage in all protein-coding genes for three *Cerastium* species.

**Supplementary Table S2A.** List of repeated sequences in the chloroplast genome of *Cerastium alpinum*. **Table S2B.** List of repeated sequences in the chloroplast genome of *Cerastium arcticum*.

**Table S2C.** List of repeated sequences in the chloroplast genome of *Cerastium nigrescens*.

**Table S2D.** List of repeated sequences in the chloroplast genome of *Cerastium glomeratum*.

**Supplementary Table S3A.** Distribution of SSR in the *Cerastium alpinum* cp genome; **Table S3B.** Distribution of SSR in the *Cerastium arcticum* cp genome. **Table S3C.** Distribution of SSR in the *Cerastium nigrescens* cp genome. **Table S3D.** Distribution of SSR in the *Cerastium glomeratum* cp genome.

**Supplementary Table S4.** Ks and Ka values of *C. glomeratum* chloroplast genome vs. other representatives of genus *Cerastium*.

**Supplementary Table S5A.** Predicted potential RNA editing sites in the protein-coding genes of *Cerastium alpinum* chloroplast genome. **Table S5B.** Predicted potential RNA editing sites in the protein-coding genes of *Cerastium arcticum* chloroplast genome. **Table S5C.** Predicted potential RNA editing sites in the protein-coding genes of *Cerastium nigrescens* chloroplast genome. **Table S5D.** Predicted potential RNA editing sites in the protein-coding genes of *Cerastium glomeratum* chloroplast genome. **Table S5E.** Predicted potential RNA editing sites in the protein-coding genes of *Cerastium arvense* chloroplast genome.

**Supplementary Figure S1.** The chloroplast genome coverage depth of *Cerastium alpinum* (A), *Cerastium arcticum* (B) and *Cerastium nigrescens* (C).

**Supplementary Figure S2.** A MAUVE alignment of *C. alpinum*, *C. arcticum*, *C. nigrescens*, *C. glomeratum*, and *C. arvense* chloroplast genomes. Within each of the alignment, local collinear blocks are represented by blocks of the same color connected by lines.

**Supplementary Figure S3.** *Cerastium alpinum*

**Supplementary Figure S4.** *Cerastium arcticum*

**Supplementary Figure S5.** *Cerastium nigrescens*
