# Supplementary material for: Complete chloroplast genomes of Cerastium alpinum, C. arcticum and C. nigrescens: genome structures, comparative and phylogenetic analysis
Source: PubMed Central journal article supplement (PMC10618263; doi:10.1038/s41598-023-46017-y), 2023-10-31
Supplement: 41598_2023_46017_MOESM8_ESM.pdf [file 41598_2023_46017_MOESM8_ESM.pdf]

# **Complete chloroplast genomes of *Cerastium alpinum*, *C. arcticum* and *C. nigrescens*: genome structures, comparative and phylogenetic analysis**

Sylwia E. Milarska<sup>1</sup>, Piotr Androsiuk<sup>1\*</sup>, Łukasz Pauksto<sup>2</sup>, Jan P. Jastrzębski<sup>1</sup>, Mateusz Maździarz<sup>2</sup>, Keith Larson<sup>3</sup> and Irena Giełwanowska<sup>1</sup>

<sup>1</sup> Department of Plant Physiology, Genetics and Biotechnology, Faculty of Biology and Biotechnology, University of Warmia and Mazury in Olsztyn, ul. M. Oczapowskiego 1A, 10-719 Olsztyn, Poland;

<sup>2</sup> Department of Botany and Nature Protection, Faculty of Biology and Biotechnology, University of Warmia and Mazury in Olsztyn, Pl. Łódzki 1, 10-721 Olsztyn, Poland;

<sup>3</sup> Climate Impacts Research Centre, Department of Ecology and Environmental Sciences, Umeå University, 901 87, Umeå, Sweden.

\* corresponding author – [piotr.androsiuk@uwm.edu.pl](mailto:piotr.androsiuk@uwm.edu.pl)

**Table S2A.** List of repeated sequences in the chloroplast genome of *Cerastium alpinum*

| Repeat length (bp) | Strat site of repeat A | Repeat A location            | Repeat A region | Strat site of repeat B | Repeat B location            | Repeat B region | Repeat type |
|--------------------|------------------------|------------------------------|-----------------|------------------------|------------------------------|-----------------|-------------|
| 30                 | 63,333                 | <i>trnS-GCU</i>              | LSC             | 97,992                 | <i>trnS-GGA</i>              | LSC             | P           |
| 30                 | 58,549                 | <i>matK</i>                  | LSC             | 58,549                 | <i>matK</i>                  | LSC             | P           |
| 30                 | 88,609                 | <i>trnS-UGA</i>              | LSC             | 97,992                 | <i>trnS-GGA</i>              | LSC             | P           |
| 30                 | 91,702                 | <i>psaB</i>                  | LSC             | 93,926                 | <i>psaA</i>                  | LSC             | F           |
| 30                 | 100,208                | <i>trnL-UAA</i> (intron)     | LSC             | 100,208                | <i>trnL-UAA</i> (intron)     | LSC             | P           |
| 30                 | 113,132                | IGS ( <i>ycf4-cemA</i> )     | LSC             | 113,132                | IGS ( <i>ycf4-cemA</i> )     | LSC             | R           |
| 30                 | 1,460                  | IGS ( <i>rps12-rrn16</i> )   | IR              | 96,827                 | <i>ycf3</i> (intron 1)       | LSC             | F           |
| 30                 | 63,333                 | <i>trnS-GCU</i>              | LSC             | 88,609                 | <i>trnS-UGA</i>              | LSC             | F           |
| 30                 | 64,936                 | <i>trnG-UCC</i>              | LSC             | 89,510                 | IGS ( <i>psbZ-rps14</i> )    | LSC             | F           |
| 31                 | 139,955                | <i>ycf2</i>                  | IR              | 139,976                | <i>ycf2</i>                  | IR              | F           |
| 32                 | 55,946                 | IGS ( <i>trnH-GUG-psbA</i> ) | LSC             | 55,984                 | IGS ( <i>trnH-GUG-psbA</i> ) | LSC             | P           |
| 34                 | 65,218                 | IGS ( <i>trnR-UCU-atpA</i> ) | LSC             | 67,647                 | <i>atpF</i> (intron)         | LSC             | P           |
| 35                 | 95,382                 | IGS ( <i>psaA-ycf3</i> )     | LSC             | 112,340                | IGS ( <i>psaI-ycf4</i> )     | LSC             | P           |
| 36                 | 82,993                 | IGS ( <i>petN-psbM</i> )     | LSC             | 82,993                 | IGS ( <i>petN-psbM</i> )     | LSC             | P           |
| 37                 | 23,345                 | <i>ndhA</i> (intron)         | SSC             | 96,815                 | <i>ycf3</i> (intron 1)       | LSC             | F           |
| 39                 | 1,446                  | IGS ( <i>rps12-rrn16</i> )   | IR              | 23,343                 | <i>ndhA</i> (intron)         | SSC             | F           |
| 39                 | 23,343                 | <i>ndhA</i> (intron)         | SSC             | 42,182                 | IGS ( <i>rrn16-rps12</i> )   | IR              | P           |
| 39                 | 1,448                  | IGS ( <i>rps12-rrn16</i> )   | IR              | 96,815                 | <i>ycf3</i> (intron 1)       | LSC             | F           |
| 46                 | 20,047                 | IGS ( <i>ndhD-psaC</i> )     | SSC             | 20,047                 | IGS ( <i>ndhD-psaC</i> )     | SSC             | P           |
| 73                 | 95,310                 | IGS ( <i>psaA-ycf3</i> )     | LSC             | 112,375                | IGS ( <i>psaI-ycf4</i> )     | LSC             | P           |

IGS (*ycf4-cemA*) means spacer between *ycf4* and *cemA*, P means palindromic match, F means forward (direct) match and R means reverse match

**Table S2B.** List of repeated sequences in the chloroplast genome of *Cerastium arcticum*

| Repeat length (bp) | Strat site of repeat A | Repeat A location            | Repeat A region | Strat site of repeat B | Repeat B location            | Repeat B region | Repeat type |
|--------------------|------------------------|------------------------------|-----------------|------------------------|------------------------------|-----------------|-------------|
| 30                 | 63,359                 | <i>trnS-GCU</i>              | LSC             | 98,903                 | <i>trnS-GGA</i>              | LSC             | P           |
| 30                 | 58,564                 | <i>matK</i>                  | LSC             | 58,564                 | <i>matK</i>                  | LSC             | P           |
| 30                 | 89,326                 | <i>trnS-UGA</i>              | LSC             | 98,903                 | <i>trnS-GGA</i>              | LSC             | P           |
| 30                 | 92,419                 | <i>psaB</i>                  | LSC             | 94,643                 | <i>psaA</i>                  | LSC             | F           |
| 30                 | 113,900                | IGS ( <i>ycf4-cemA</i> )     | LSC             | 113,900                | IGS ( <i>ycf4-cemA</i> )     | LSC             | R           |
| 30                 | 1,451                  | IGS ( <i>rps12-rrn16</i> )   | IR              | 97,732                 | <i>ycf3</i> (intron 1)       | LSC             | F           |
| 30                 | 63,359                 | <i>trnS-GCU</i>              | LSC             | 89,326                 | <i>trnS-UGA</i>              | LSC             | F           |
| 30                 | 64,942                 | <i>trnG-UCC</i>              | LSC             | 90,227                 | IGS ( <i>psbZ-rps14</i> )    | LSC             | F           |
| 31                 | 65,242                 | IGS ( <i>trnR-UCU-atpA</i> ) | LSC             | 67,677                 | <i>atpF</i> (intron)         | LSC             | P           |
| 31                 | 140,727                | <i>ycf2</i>                  | IR              | 140,748                | <i>ycf2</i>                  | IR              | F           |
| 31                 | 97,369                 | <i>ycf3</i> (intron 2)       | LSC             | 97,383                 | <i>ycf3</i> (intron 2)       | LSC             | F           |
| 33                 | 55,959                 | IGS ( <i>trnH-GUG-psbA</i> ) | LSC             | 55,998                 | IGS ( <i>trnH-GUG-psbA</i> ) | LSC             | P           |
| 34                 | 100,973                | <i>trnL-UAA</i> (intron)     | LSC             | 100,977                | <i>trnL-UAA</i> (intron)     | LSC             | P           |
| 36                 | 83,701                 | IGS ( <i>petN-psbM</i> )     | LSC             | 83,701                 | IGS ( <i>petN-psbM</i> )     | LSC             | P           |
| 37                 | 23,356                 | <i>ndhA</i> (intron)         | SSC             | 97,720                 | <i>ycf3</i> (intron 1)       | LSC             | F           |
| 39                 | 1,437                  | IGS ( <i>rps12-rrn16</i> )   | IR              | 23,354                 | <i>ndhA</i> (intron)         | SSC             | F           |
| 39                 | 23,354                 | <i>ndhA</i> (intron)         | SSC             | 42,199                 | IGS ( <i>rrn16-rps12</i> )   | IR              | P           |
| 39                 | 1,439                  | IGS ( <i>rps12-rrn16</i> )   | IR              | 97,720                 | <i>ycf3</i> (intron 1)       | LSC             | F           |
| 43                 | 97,333                 | <i>ycf3</i> (intron 2)       | LSC             | 97,360                 | <i>ycf3</i> (intron 2)       | LSC             | F           |
| 46                 | 20,055                 | IGS ( <i>ndhD-psaC</i> )     | SSC             | 20,055                 | IGS ( <i>ndhD-psaC</i> )     | SSC             | P           |
| 61                 | 68,941                 | IGS ( <i>atpH-atpI</i> )     | LSC             | 69,002                 | IGS ( <i>atpH-atpI</i> )     | LSC             | F           |
| 72                 | 96,199                 | IGS ( <i>psaA-ycf3</i> )     | LSC             | 113,109                | IGS ( <i>psaI-ycf4</i> )     | LSC             | P           |
| 162                | 96,109                 | IGS ( <i>psaA-ycf3</i> )     | LSC             | 113,109                | IGS ( <i>psaI-ycf4</i> )     | LSC             | P           |

IGS (*ycf4-cemA*) means spacer between *ycf4* and *cemA*, P means palindromic match, F means forward (direct) match and R means reverse match

**Table S2C.** List of repeated sequences in the chloroplast genome of *Cerastium nigrescens*

| Repeat length (bp) | Strat site of repeat A | Repeat A location            | Repeat A region | Strat site of repeat B | Repeat B location            | Repeat B region | Repeat type |
|--------------------|------------------------|------------------------------|-----------------|------------------------|------------------------------|-----------------|-------------|
| 30                 | 63,336                 | <i>trnS-GCU</i>              | LSC             | 98,004                 | <i>trnS-GGA</i>              | LSC             | P           |
| 30                 | 585,48                 | <i>matK</i>                  | LSC             | 58,548                 | <i>matK</i>                  | LSC             | P           |
| 30                 | 88,612                 | <i>trnS-UGA</i>              | LSC             | 98,004                 | <i>trnS-GGA</i>              | LSC             | P           |
| 30                 | 91,705                 | <i>psaB</i>                  | LSC             | 93,929                 | <i>psaA</i>                  | LSC             | F           |
| 30                 | 100,215                | <i>trnL-UAA</i> (intron)     | LSC             | 100,215                | <i>trnL-UAA</i> (intron)     | LSC             | P           |
| 30                 | 113,134                | IGS ( <i>ycf4-cemA</i> )     | LSC             | 113,134                | IGS ( <i>ycf4-cemA</i> )     | LSC             | R           |
| 30                 | 1,460                  | IGS ( <i>rps12-rrn16</i> )   | IR              | 96,839                 | <i>ycf3</i> (intron 1)       | LSC             | F           |
| 30                 | 63,336                 | <i>trnS-GCU</i>              | LSC             | 88,612                 | <i>trnS-UGA</i>              | LSC             | F           |
| 30                 | 64,939                 | <i>trnG-UCC</i>              | LSC             | 89,513                 | IGS ( <i>psbZ-rps14</i> )    | LSC             | F           |
| 31                 | 139,950                | <i>ycf2</i>                  | IR              | 139,971                | <i>ycf2</i>                  | IR              | F           |
| 32                 | 55,945                 | IGS ( <i>trnH-GUG-psbA</i> ) | LSC             | 55,983                 | IGS ( <i>trnH-GUG-psbA</i> ) | LSC             | P           |
| 34                 | 65,221                 | IGS ( <i>trnR-UCU-atpA</i> ) | LSC             | 67,650                 | <i>atpF</i> (intron)         | LSC             | P           |
| 35                 | 95,394                 | IGS ( <i>psaA-ycf3</i> )     | LSC             | 112,342                | IGS ( <i>psaI-ycf4</i> )     | LSC             | P           |
| 36                 | 82,996                 | IGS ( <i>petN-psbM</i> )     | LSC             | 82,996                 | IGS ( <i>petN-psbM</i> )     | LSC             | P           |
| 37                 | 23,345                 | <i>ndhA</i> (intron)         | SSC             | 96,827                 | <i>ycf3</i> (intron 1)       | LSC             | F           |
| 39                 | 1,446                  | IGS ( <i>rps12-rrn16</i> )   | IR              | 23,343                 | <i>ndhA</i> (intron)         | SSC             | F           |
| 39                 | 23,343                 | <i>ndhA</i> (intron)         | SSC             | 42,181                 | IGS ( <i>rrn16-rps12</i> )   | IR              | P           |
| 39                 | 1,448                  | IGS ( <i>rps12-rrn16</i> )   | IR              | 96,827                 | <i>ycf3</i> (intron 1)       | LSC             | F           |
| 46                 | 20,047                 | IGS ( <i>ndhD-psaC</i> )     | SSC             | 20,047                 | IGS ( <i>ndhD-psaC</i> )     | SSC             | P           |
| 73                 | 95,322                 | IGS ( <i>psaA-ycf3</i> )     | LSC             | 112,377                | IGS ( <i>psaI-ycf4</i> )     | LSC             | P           |

IGS (*ycf4-cemA*) means spacer between *ycf4* and *cemA*, P means palindromic match, F means forward (direct) match and R means reverse match

**Table S2D.** List of repeated sequences in the chloroplast genome of *Cerastium glomeratum*

| Repeat length (bp) | Strat site of repeat A | Repeat A location             | Repeat A region | Strat site of repeat B | Repeat B location             | Repeat B region | Repeat type |
|--------------------|------------------------|-------------------------------|-----------------|------------------------|-------------------------------|-----------------|-------------|
| 30                 | 63,304                 | <i>trnS-GCU</i>               | LSC             | 98,815                 | <i>trnS-GGA</i>               | LSC             | P           |
| 30                 | 89,290                 | <i>trnS-UGA</i>               | LSC             | 98,815                 | <i>trnS-GGA</i>               | LSC             | P           |
| 30                 | 92,395                 | <i>psaB</i>                   | LSC             | 94,619                 | <i>psaA</i>                   | LSC             | F           |
| 30                 | 113,867                | IGS ( <i>ycf4-cemA</i> )      | LSC             | 113,867                | IGS ( <i>ycf4-cemA</i> )      | LSC             | R           |
| 30                 | 63,304                 | <i>trnS-GCU</i>               | LSC             | 89,290                 | <i>trnS-UGA</i>               | LSC             | F           |
| 30                 | 64,873                 | <i>trnG-UCC</i>               | LSC             | 90,194                 | <i>trnG-GCC</i>               | LSC             | F           |
| 31                 | 140,629                | <i>ycf2</i>                   | IR              | 140,650                | <i>ycf2</i>                   | IR              | F           |
| 31                 | 100,965                | <i>trnL-UAA</i> (intron)      | LSC             | 100,965                | <i>trnL-UAA</i> (intron)      | LSC             | P           |
| 33                 | 55,897                 | IGS ( <i>trnH-GUG-psbA</i> )  | LSC             | 55,936                 | IGS ( <i>trnH-GUG-psbA</i> )  | LSC             | P           |
| 36                 | 58,506                 | <i>matK</i>                   | LSC             | 58,506                 | <i>matK</i>                   | LSC             | P           |
| 36                 | 83,674                 | IGS ( <i>petN-psbM</i> )      | LSC             | 83,674                 | IGS ( <i>petN-psbM</i> )      | LSC             | P           |
| 39                 | 1,446                  | IGS ( <i>rps12-trnV-GAC</i> ) | IR              | 20,343                 | <i>ndhA</i> (intron)          | SSC             | P           |
| 39                 | 20,343                 | <i>ndhA</i> (intron)          | SSC             | 42,115                 | IGS ( <i>trnV-GAC-rps12</i> ) | IR              | F           |
| 46                 | 23,632                 | IGS ( <i>psaC-ndhD</i> )      | SSC             | 23,632                 | IGS ( <i>psaC-ndhD</i> )      | SSC             | P           |
| 85                 | 96,157                 | IGS ( <i>psaA-ycf3</i> )      | LSC             | 113,077                | IGS ( <i>psaI-ycf4</i> )      | LSC             | P           |
| 170                | 96,072                 | IGS ( <i>psaA-ycf3</i> )      | LSC             | 113,077                | IGS ( <i>psaI-ycf4</i> )      | LSC             | P           |

IGS (*ycf4-cemA*) means spacer between *ycf4* and *cemA*, P means palindromic match, F means forward (direct) match and R means reverse match
