# Supplementary material for: Complete chloroplast genomes of Cerastium alpinum, C. arcticum and C. nigrescens: genome structures, comparative and phylogenetic analysis
Source: PubMed Central journal article supplement (PMC10618263; doi:10.1038/s41598-023-46017-y), 2023-10-31
Supplement: 41598_2023_46017_MOESM9_ESM.pdf [file 41598_2023_46017_MOESM9_ESM.pdf]

# **Complete chloroplast genomes of *Cerastium alpinum*, *C. arcticum* and *C. nigrescens*: genome structures, comparative and phylogenetic analysis**

Sylwia E. Milarska<sup>1</sup>, Piotr Androsiuk<sup>1\*</sup>, Łukasz Pauksto<sup>2</sup>, Jan P. Jastrzębski<sup>1</sup>, Mateusz Maździarz<sup>2</sup>, Keith Larson<sup>3</sup> and Irena Gielwanowska<sup>1</sup>

<sup>1</sup> Department of Plant Physiology, Genetics and Biotechnology, Faculty of Biology and Biotechnology, University of Warmia and Mazury in Olsztyn, ul. M. Oczapowskiego 1A, 10-719 Olsztyn, Poland;

<sup>2</sup> Department of Botany and Nature Protection, Faculty of Biology and Biotechnology, University of Warmia and Mazury in Olsztyn, Pl. Łódzki 1, 10-721 Olsztyn, Poland;

<sup>3</sup> Climate Impacts Research Centre, Department of Ecology and Environmental Sciences, Umeå University, 901 87, Umeå, Sweden.

\* corresponding author – [piotr.androsiuk@uwm.edu.pl](mailto:piotr.androsiuk@uwm.edu.pl)

**Table S3A.** Distribution of SSR in the *Cerastium alpinum* cp genome.

| Type            | Repeat unit | Length (bp) | Start   | End     | Location                         |
|-----------------|-------------|-------------|---------|---------|----------------------------------|
| Mononucleotide  | A           | 12          | 11,878  | 11,889  | <i>ycf1</i>                      |
|                 |             | 13          | 28,119  | 28,131  | <i>ycf1</i>                      |
|                 |             | 12          | 58,788  | 58,799  | <i>matK</i>                      |
|                 |             | 12          | 73,365  | 73,376  | <i>rpoC2</i>                     |
|                 |             | 13          | 83,607  | 83,619  | IGS ( <i>psbM-psbD</i> )         |
|                 |             | 12          | 85,146  | 85,157  | IGS ( <i>psbM-psbD</i> )         |
|                 |             | 12          | 95,444  | 95,455  | IGS ( <i>psaA-ycf3</i> )         |
|                 |             | 12          | 99,608  | 99,619  | IGS ( <i>trnT-UGU-trnL-UAA</i> ) |
|                 |             | 13          | 133,151 | 133,163 | IGS ( <i>rpl14-rpl16</i> )       |
| Trinucleotide   | AAT         | 13          | 14,074  | 14,086  | <i>ndhF</i>                      |
|                 |             | 12          | 63,563  | 63,574  | IGS ( <i>trnS-GCU-trnG-UCC</i> ) |
|                 |             | 14          | 63,906  | 63,919  | IGS ( <i>trnS-GCU-trnG-UCC</i> ) |
|                 |             | 14          | 97,915  | 97,928  | IGS ( <i>ycf3-trnS-GGA</i> )     |
|                 |             | 17          | 99,389  | 99,405  | IGS ( <i>trnT-UGU-trnL-UAA</i> ) |
|                 |             | 12          | 118,910 | 118,921 | IGS ( <i>trnP-UGG-psaI</i> )     |
|                 |             | 12          | 120,081 | 120,092 | IGS ( <i>rpl33-rps18</i> )       |
| Tetranucleotide | ACCT        | 14          | 8,761   | 8,774   | <i>rrn23</i>                     |
|                 | AAAT        | 12          | 18,720  | 18,731  | <i>ndhD</i>                      |
|                 | AATT        | 12          | 63,461  | 63,472  | IGS ( <i>trnS-GCU-trnG-UCC</i> ) |
|                 | AATT        | 12          | 100,217 | 100,228 | <i>trnL-UAA</i> (intron)         |
| Pentanucleotide | AATAT       | 16          | 99,417  | 99,432  | IGS ( <i>trnT-UGU-trnL-UAA</i> ) |

IGS (*psbM-psbD*) means spacer between *psbM* and *psbD*

**Table S3B.** Distribution of SSR in the *Cerastium arcticum* cp genome.

| Type            | Repeat unit | Length (bp) | Start   | End     | Location                         |
|-----------------|-------------|-------------|---------|---------|----------------------------------|
| Mononucleotide  | A           | 12          | 11,877  | 11,888  | <i>ycf1</i>                      |
|                 |             | 13          | 28,131  | 28,143  | <i>ycf1</i>                      |
|                 |             | 12          | 58,803  | 58,814  | <i>matK</i>                      |
|                 |             | 12          | 73,460  | 73,471  | <i>rpoC2</i>                     |
|                 |             | 18          | 84,321  | 84,338  | IGS ( <i>psbM-psbD</i> )         |
|                 |             | 12          | 98,695  | 98,706  | IGS ( <i>ycf3-trnS-GGA</i> )     |
|                 |             | 14          | 98,799  | 98,812  | IGS ( <i>ycf3-trnS-GGA</i> )     |
|                 |             | 13          | 100,388 | 100,400 | IGS ( <i>trnT-UGU-trnL-UAA</i> ) |
|                 |             | 12          | 119,927 | 119,938 | IGS ( <i>trnP-UGG-psaI</i> )     |
|                 |             | 14          | 133,918 | 133,931 | IGS ( <i>rpl14-rpl16</i> )       |
| Trinucleotide   | AAT         | 13          | 14,073  | 14,085  | <i>ndhF</i>                      |
|                 |             | 12          | 63,567  | 63,578  | IGS ( <i>trnS-GCU-trnG-UCC</i> ) |
|                 |             | 16          | 71,387  | 71,402  | IGS ( <i>rps2-rpoC2</i> )        |
|                 |             | 14          | 98,826  | 98,839  | IGS ( <i>ycf3-trnS-GGA</i> )     |
|                 |             | 17          | 100,304 | 100,320 | IGS ( <i>trnT-UGU-trnL-UAA</i> ) |
|                 |             | 12          | 119,684 | 119,695 | IGS ( <i>trnP-UGG-psaI</i> )     |
|                 |             | 12          | 120,864 | 120,875 | IGS ( <i>rpl33-rps18</i> )       |
| Tetranucleotide | ACCT        | 14          | 8,756   | 8,769   | <i>rrn23</i>                     |
|                 | AAAT        | 12          | 18,728  | 18,739  | <i>ndhD</i>                      |
|                 | AATT        | 12          | 63,487  | 63,498  | IGS ( <i>trnS-GCU-trnG-UCC</i> ) |
|                 | AGAT        | 12          | 101,035 | 101,046 | <i>trnL-UAA</i> (intron)         |
|                 | AATT        | 12          | 134,509 | 134,520 | <i>rpl16</i> (intron)            |
| Hexanucleotide  | AAATCC      | 19          | 29,127  | 29,145  | <i>ycf1</i>                      |

IGS (*psbM-psbD*) means spacer between *psbM* and *psbD*

**Table S3C.** Distribution of SSR in the *Cerastium nigrescens* cp genome.

| Type            | Repeat unit | Length (bp) | Start   | End     | Location                         |
|-----------------|-------------|-------------|---------|---------|----------------------------------|
| Mononucleotide  | A           | 12          | 11,878  | 11,889  | <i>ycf1</i>                      |
|                 |             | 13          | 28,118  | 28,130  | <i>ycf1</i>                      |
|                 |             | 12          | 58,787  | 58,798  | <i>matK</i>                      |
|                 |             | 12          | 73,368  | 73,379  | <i>rpoC2</i>                     |
|                 |             | 13          | 83,610  | 83,622  | IGS ( <i>psbM-psbD</i> )         |
|                 |             | 12          | 85,149  | 85,160  | IGS ( <i>psbM-psbD</i> )         |
|                 |             | 12          | 99,615  | 99,626  | IGS ( <i>trnT-UGU-trnL-UAA</i> ) |
|                 |             | 13          | 133,146 | 133,158 | IGS ( <i>rpl14-rpl16</i> )       |
| Trinucleotide   | AAT         | 13          | 14,074  | 14,086  | <i>ndhF</i>                      |
|                 |             | 12          | 63,566  | 63,577  | IGS ( <i>trnS-GCU-trnG-UCC</i> ) |
|                 |             | 15          | 64,281  | 64,295  | <i>trnG-UCC</i> (intron)         |
|                 |             | 14          | 97,927  | 97,940  | IGS ( <i>ycf3-trnS-GGA</i> )     |
|                 |             | 17          | 99,401  | 99,417  | IGS ( <i>trnT-UGU-trnL-UAA</i> ) |
|                 |             | 12          | 118,915 | 118,926 | IGS ( <i>trnP-UGG-psaI</i> )     |
|                 |             | 12          | 120,090 | 120,101 | IGS ( <i>rpl33-rps18</i> )       |
| Tetranucleotide | ACCT        | 14          | 8,761   | 8,774   | <i>rrn23</i>                     |
|                 | AAAT        | 12          | 18,720  | 18,731  | <i>ndhD</i>                      |
|                 | AATT        | 12          | 63,464  | 63,475  | IGS ( <i>trnS-GCU-trnG-UCC</i> ) |
|                 | AATT        | 12          | 100,224 | 100,235 | <i>trnL-UAA</i> (intron)         |
|                 | AAAT        | 13          | 119,006 | 119,018 | IGS ( <i>trnP-UGG-psaI</i> )     |

IGS (*psbM-psbD*) means spacer between *psbM* and *psbD*

**Table S3D.** Distribution of SSR in the *Cerastium glomeratum* cp genome.

| Type            | Repeat unit | Length (bp) | Start   | End     | Location                         |
|-----------------|-------------|-------------|---------|---------|----------------------------------|
| Mononucleotide  | A           | 12          | 11,891  | 11,902  | <i>ycf1</i>                      |
|                 |             | 13          | 15,556  | 15,568  | <i>ycf1</i>                      |
|                 |             | 12          | 21,753  | 21,764  | IGS ( <i>ndhI-ndhG</i> )         |
|                 |             | 12          | 58,751  | 58,762  | <i>matK</i>                      |
|                 |             | 12          | 62,984  | 62,995  | IGS ( <i>psbK-psbI</i> )         |
|                 |             | 12          | 73,367  | 73,378  | <i>rpoC2</i>                     |
|                 |             | 13          | 98,611  | 98,623  | IGS ( <i>ycf3-trnS-GGA</i> )     |
|                 |             | 12          | 104,764 | 104,775 | IGS ( <i>ndhC-trnV-UAC</i> )     |
| Dinucleotide    | AT          | 13          | 89,161  | 89,173  | IGS ( <i>psbC-trnS-UGA</i> )     |
| Trinucleotide   | AAT         | 13          | 29,502  | 29,514  | <i>ndhF</i>                      |
|                 |             | 12          | 63,517  | 63,528  | IGS ( <i>trnS-GCU-trnG-UCC</i> ) |
|                 |             | 13          | 63,653  | 63,665  | IGS ( <i>trnS-GCU-trnG-UCC</i> ) |
|                 |             | 14          | 98,738  | 98,751  | IGS ( <i>ycf3-trnS-GGA</i> )     |
|                 |             | 12          | 120,777 | 120,788 | IGS ( <i>rpl33-rps18</i> )       |
|                 |             | 13          | 145,896 | 145,908 | IGS ( <i>trnL-CAA-ndhB</i> )     |
| Tetranucleotide | ACCT        | 14          | 8,775   | 8,788   | <i>rrn23</i>                     |
|                 | AAAT        | 12          | 24,995  | 25,006  | <i>ndhD</i>                      |
|                 | AATT        | 12          | 98,268  | 98,279  | <i>ycf3</i> (intron 1)           |
|                 | AATT        | 13          | 99,791  | 99,803  | IGS ( <i>rps4-trnT-UGU</i> )     |
|                 | AAAT        | 12          | 110,398 | 110,409 | IGS ( <i>rbcl-accD</i> )         |
|                 | AAAG        | 12          | 118,080 | 118,091 | IGS ( <i>psbE-petL</i> )         |
|                 | AAAT        | 12          | 124,724 | 124,735 | <i>clpP</i> (intron 1)           |

IGS (*ndhI-ndhG*) means spacer between *ndhI* and *ndhG*
